# Supplementary material
Source: Springer Nature journal article supplement (https://www.springermedizin.de/resource/supplementary/12889_2009_1867_MOESM5_ESM.pdf/9504240)

**O1** certain conditions originating in the perinatal period

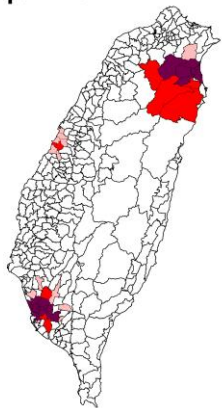

**O2** certain conditions originating in the perinatal period

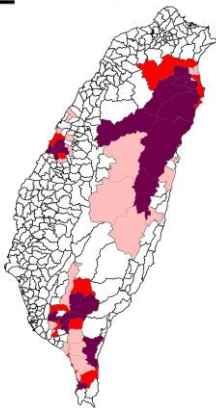

**P1** congenital anomalies

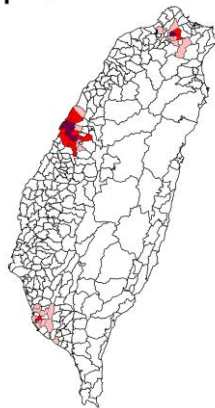

**P2** congenital anomalies

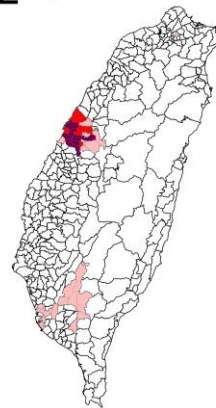

**Q1** anaemias

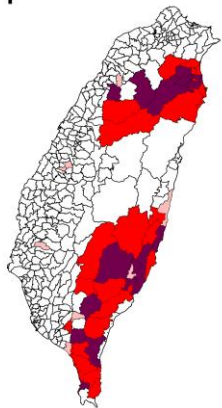

**Q2** anaemias

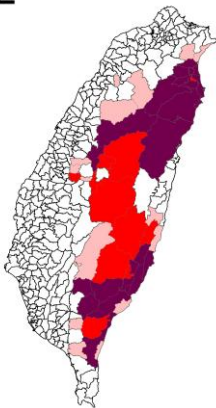

**R1** homicide

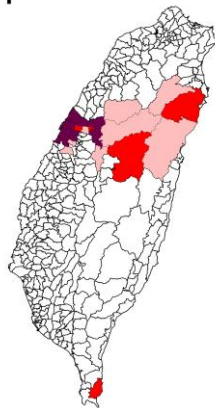

**R2** homicide

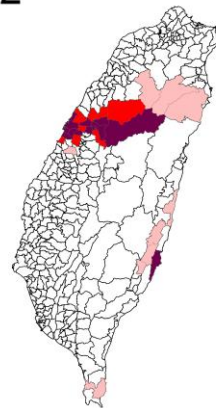

**S1** meningitis

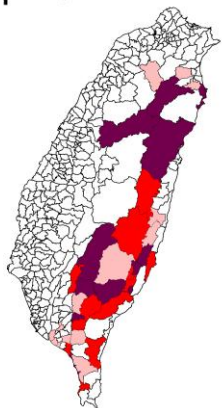

**S2** meningitis

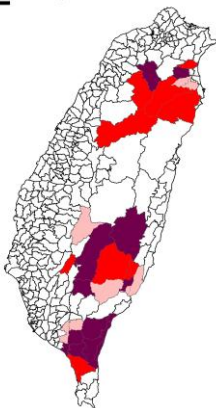

**T1** other protein-calorie malnutrition

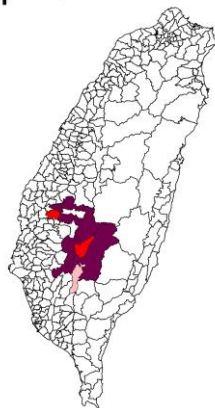

**T2** other protein-calorie malnutrition

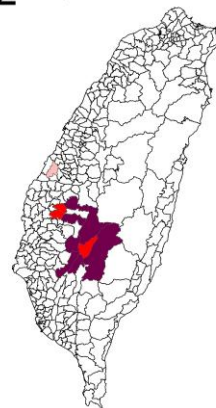

Supplement: MOESM5 [file 9504240]
